# Supplementary material
Source: ML conference proceedings conference paper supplement (https://proceedings.neurips.cc/paper_files/paper/2019/hash/cd6b73b67c77edeaff94e24b961119dd-Abstract.html)
Supplement: Supplementary file [file cd6b73b67c77edeaff94e24b961119dd-Supplemental.zip]

## A Proofs

*Proof of Proposition 1.*  $w(F(x))$  satisfies: (i) non-decreasing since both  $w(\cdot)$  and  $F(\cdot)$  are non-decreasing; (ii)  $\lim_{x \rightarrow +\infty} w(F(x)) = w\left(\lim_{x \rightarrow +\infty} F(x)\right) = 1$ ,  $\lim_{x \rightarrow -\infty} w(F(x)) = w\left(\lim_{x \rightarrow -\infty} F(x)\right) = 0$ ; and (iii) right continuous since both  $w(\cdot)$  and  $F(\cdot)$  are continuous. Thus, as shown in Theorem 1.2.2 in [7],  $w(F(x))$  is a cumulative distribution function.

*Proof of Lemma 1.* First, notice that  $w_{\text{POLY}}(P(E))' = \lim_{\Delta \rightarrow 0} (w_{\text{POLY}}(P(E) + \Delta; a, b) - w_{\text{POLY}}(P(E); a, b)) / \Delta$ . Denote  $P(E)$  to be  $y$ . Then,  $w_{\text{POLY}}(y)' = \frac{3(3-3b)}{a^2-a+1} (y^2 - \frac{2(a+1)}{3}y + \frac{a}{3}) + 1 = \frac{3(3-3b)}{a^2-a+1} ((y - \frac{a+1}{3})^2 + (\frac{a}{3} - \frac{(a+1)^2}{9})) + 1$ . Let  $u = |y - \frac{a+1}{3}|$ . Then,  $w'(y) = \frac{3(3-3b)}{a^2-a+1} (u^2 + (\frac{a}{3} - \frac{(a+1)^2}{9})) + 1 = f(u)$ .  $f'(u) = \frac{6(3-3b)}{a^2-a+1} u \geq 0$ . Therefore,  $f(u)$  is a monotonically increasing function of  $u$ . Thus, the lemma follows.

*Proof of Lemma 2.* Recall that we are given a family of models  $\{\mathcal{M}_\theta \mid \theta \in [0, 1]\}$  whose losses  $\{\ell(\theta) \mid \theta \in [0, 1]\}$  are parameterized by  $\theta$ . For all  $\theta \in [0, 1]$ ,  $\ell(\theta)$  follows a Bernoulli distribution:

$$P\left(\ell(\theta) = 1 - \left(\frac{1-\theta}{\theta}\right)^{1/2}\right) = \theta, P\left(\ell(\theta) = 1 + \left(\frac{\theta}{1-\theta}\right)^{1/2}\right) = 1 - \theta.$$

The mean and variance of the losses are the same, i.e.  $\mathbb{E}[\ell(\theta)] = 1$  and  $\text{Var}(\ell(\theta)) = 1$ . Thus, the skewness of  $\ell(\theta)$  is

$$\text{Skewness}(\ell(\theta)) = \frac{2\theta - 1}{\sqrt{\theta(1-\theta)}}.$$

Denote  $\alpha_\theta = 1 - \left(\frac{1-\theta}{\theta}\right)^{1/2}$ ,  $\beta_\theta = 1 + \left(\frac{\theta}{1-\theta}\right)^{1/2}$  and  $\alpha_\theta \leq 1 \leq \beta_\theta$ .

$$R_H(\ell(\theta); w) = \alpha_\theta(w(\theta) - w(0)) + \beta_\theta(w(1) - w(\theta)) = \alpha_\theta w(\theta) + \beta_\theta(1 - w(\theta)).^3$$

Then, for different polynomial form of CPT probability weighting function  $w_1$  and  $w_2$ ,

$$R_H(\ell(\theta); w_1) - R_H(\ell(\theta); w_2) = (\beta_\theta - \alpha_\theta)(w_2(\theta) - w_1(\theta)).$$

Suppose that the probability weighting functions  $w_1, w_2$  have the parametric form suggested by Equation 3 with parameter  $a_1, b_1$  and  $a_2, b_2$  respectively. If  $a_1 = a_2 = \frac{1}{2}$  and  $b_1 < b_2$ , then  $w_1(\theta) > w_2(\theta)$  on  $[0, .5)$  and  $w_1(\theta) < w_2(\theta)$  on  $(.5, 1]$ .

- If  $0 \leq \theta < .5$ , then  $R_H(\theta; w_1) < R_H(\theta; w_2)$ .
- If  $.5 < \theta \leq 1$ , then  $R_H(\theta; w_2) < R_H(\theta; w_1)$ .

*Proof of Lemma 3.* First, notice that  $w_{\text{IT}}(0) = 0$  and  $w_{\text{IT}}(1) = 1$ . The fixed point of  $w_{\text{IT}}$  is  $\frac{1}{2}$  because  $w_{\text{IT}}(1/2) = 1/2$ . Since  $w'_{\text{IT}}(y) = -1/2 \ln(y \cdot (1-y)) > 0$  for all  $x \in [0, 1]$ ,  $w_{\text{IT}}$  is monotonically increasing. Notice that  $w''_{\text{IT}}(y) = \frac{2y-1}{2y(1-y)}$ . Since  $w''_{\text{IT}}(y) < 0$  for all  $y \in [0, \frac{1}{2})$  and  $w''_{\text{IT}}(y) > 0$  for all  $y \in (\frac{1}{2}, 1]$ ,  $w'_{\text{IT}}$  is monotonically decreasing on  $[0, \frac{1}{2})$  and monotonically increasing on  $(\frac{1}{2}, 1]$ . Thus,  $w_{\text{IT}} \in \mathcal{W}_{\text{CPT}}$ .

<sup>3</sup>The loss distribution is discrete in this case. We have used the CPT-weighted rank-dependent utility of a discrete random variable to obtain the human risk [5].

*Connection between  $w_{IT}$  and  $w_{POLY}$ .* Let  $y = F(\ell)$  and  $w'_{IT}(y) = \frac{dw_{IT}(y)}{dy}$ .

$$\begin{aligned}
w_{POLY}(y; 1/2, \ln 2) &= 4y^3 - 6y^2 + 3y + (-4 \ln 2y^3 + 6 \ln 2y^2 - 2 \ln 2y) \\
&= 4y^3 - 6y^2 + 3y + g(y) \\
&\approx 4y^3 - 6y^2 + 3y + g(1/2) + g'(1/2)(y - 1/2) \\
&= 4y^3 - 6y^2 + 3y + (\ln 2y - \ln 2/2) \\
&= w_{IT}(1/2) + w'_{IT}(1/2)(y - 1/2) + \frac{w''_{IT}(1/2)}{2}(y - 1/2)^2 + \frac{w'''_{IT}(1/2)}{6}(y - 1/2)^3 \\
&\approx w_{IT}(y).
\end{aligned}$$

The first approximation is done by the first order Taylor expansion of  $g(y)$  around  $1/2$  and the second approximation is done through the third order Taylor expansion of  $w_{IT}$  around  $1/2$ .

## B Optimization of EHRM

Optimally optimizing empirical human-aligned risk is an interesting open question. However, the heuristic approach described in Section 3 performs relatively well in the experiments. Figure 4 and 5 show the empirical human risk (at training time) of experiments in Section 5.1 and 5.3 respectively.

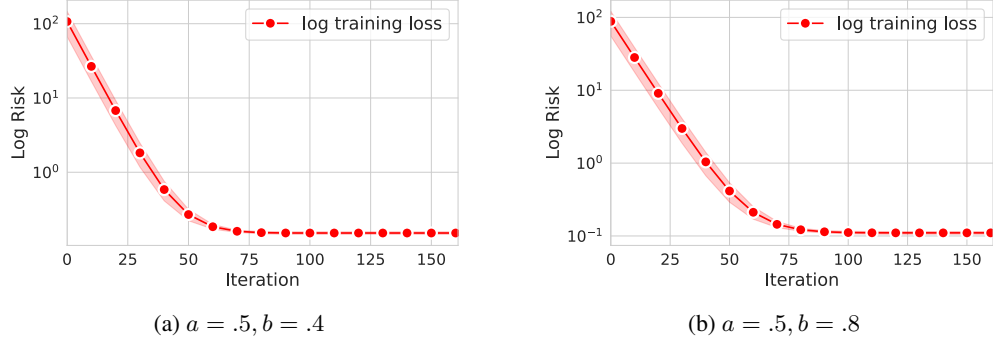

Figure 4: Using a fixed learning rate .05 and optimization method described in Section 3, empirical human risk of the experiments in Section 5.1 converge within 100 iterations.

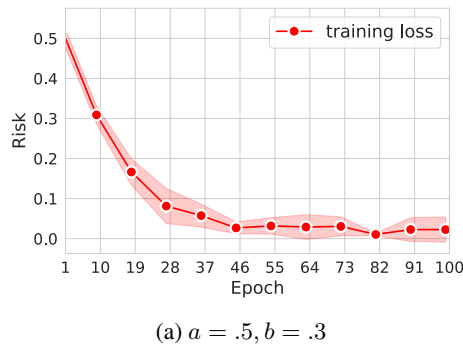

Figure 5: Using the optimization method described in Section 5.3, empirical human risk of the experiment (Section 5.3) converges in 100 epochs.

## C Fairness Metrics

Denote true positive rate as TPR, false positive rate as FPR, false negative rate as FNG, covariate as  $X \in \mathcal{X}$  and label as  $Y \in \{0, 1\}$ . As suggested by [2], we define the below fairness metrics in terms of the privileged group  $G_1 \subseteq \mathcal{X}$  and unprivileged group  $G_2 \subseteq \mathcal{X}$ :

1. Statistical Parity Difference:  $P(Y = 1|X \in G_2) - P(Y = 1|X \in G_1)$ .
2. Disparate Impact:  $\frac{P(Y=1|X \in G_2)}{P(Y=1|X \in G_1)}$ .
3. Equal Opportunity Difference:  $\text{TPR}(G_2) - \text{TPR}(G_1)$ .
4. Average Odds Difference:  $\frac{1}{2}(\text{FPR}(G_2) - \text{FPR}(G_1) + (\text{TPR}(G_2) - \text{TPR}(G_1)))$ .
5. Theil Index:  $\frac{1}{n} \sum_{i=1}^n \frac{b_i}{\mu} \ln(\frac{b_i}{\mu})$  where  $b_i = \hat{Y}_i - Y_i + 1$  and  $\mu = \frac{1}{n} \sum_{i=1}^n b_i$ .  $\hat{Y}_i$  is the prediction of  $X_i$  and  $n$  is the number of samples.
6. False Negative Rate Difference:  $\text{FNR}(G_2) - \text{FNR}(G_1)$ .

## D Model Configuration

The model configuration for the gender classification task (Section 5.3) is as follows: 3 convolutional layers (with number of output channels (6, 16, 16) respectively, kernel size (5, 5, 6) respectively and a  $2 \times 2$  max-pooling on the outputs of the first layer), followed by two fully connected layers (the first has 120 hidden units and the second is the output layer with 2 output units); all activation functions are ReLU and all convolutional layers use stride 1.
